# Supplementary material for: New biosourced AA and AB monomers from 1,4:3,6-dianhydrohexitols, Isosorbide, Isomannide, and Isoidide
Source: PubMed Central journal article supplement (PMC5812125; doi:10.1080/15685551.2016.1239175), 2016-10-23
Supplement: TDMP_A_1239175_SM4339.pdf [file TDMP_A_1239175_SM4339.pdf]

## Supporting Information

### **New biosourced AA and AB monomers from 1,4:3,6-dianhydrohexitols, Isosorbide, Isomannide and Isoidide**

Asma Saadaoui<sup>a,c,d</sup>, Raouf Medimagh<sup>a\*</sup>, Sylvain Marque<sup>b</sup>, Damien Prim<sup>b</sup>, Saber Chatti<sup>c</sup>,  
Herve Casabianca<sup>c</sup> & Mongia Said Zina<sup>d</sup>

<sup>a</sup>Institut National de Recherche et d'Analyse Physico-chimique (INRAP), Laboratoire des Substances Naturelles (LR10INRAP02), Sidi Thabet Biotechpole, Ariana 2020, (Tunisia).

<sup>b</sup>Université de Versailles-St-Quentin (UVSQ), Institut Lavoisier de Versailles (ILV) UMR CNRS 8180, 45 Avenue des Etats-Unis, 78035 Versailles Cedex, France

<sup>c</sup>Université de Lyon 1, Institut des Sciences Analytiques, UMR5280, CNRS, ENS-Lyon, 5 rue de la Doua, F-69100 Villeurbanne (France).

<sup>d</sup>Faculté des Sciences de Tunis, Université de Tunis El Manar 2092 Tunis (Tunisia).

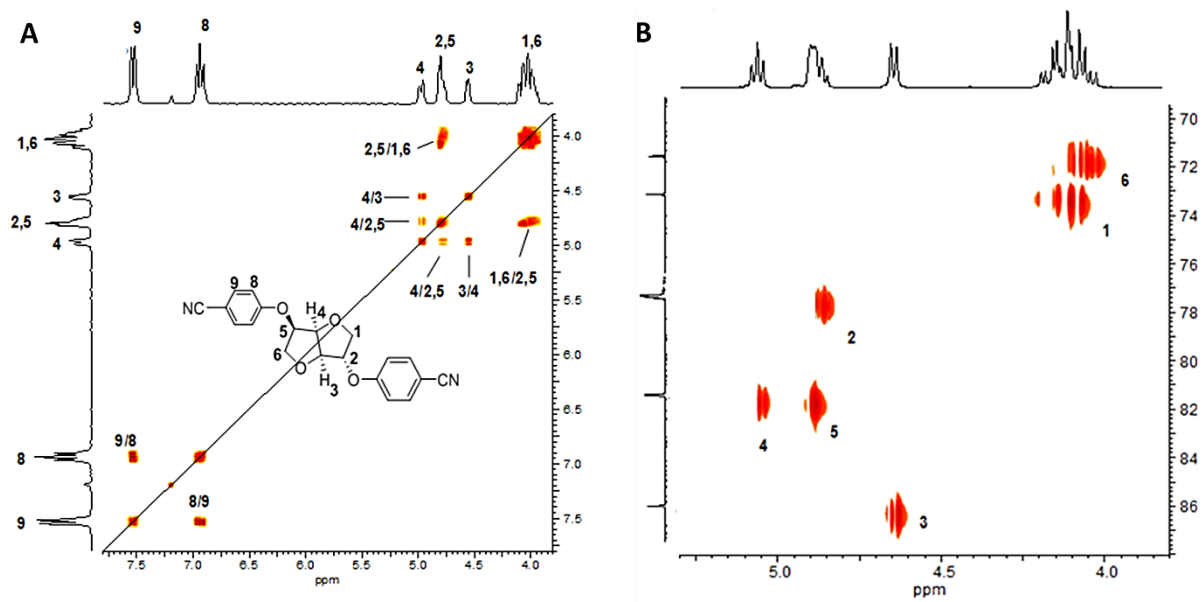

**Figure S1.** 300 MHz 2D correlation spectra (A) COSY and (B) HSQC of **11**

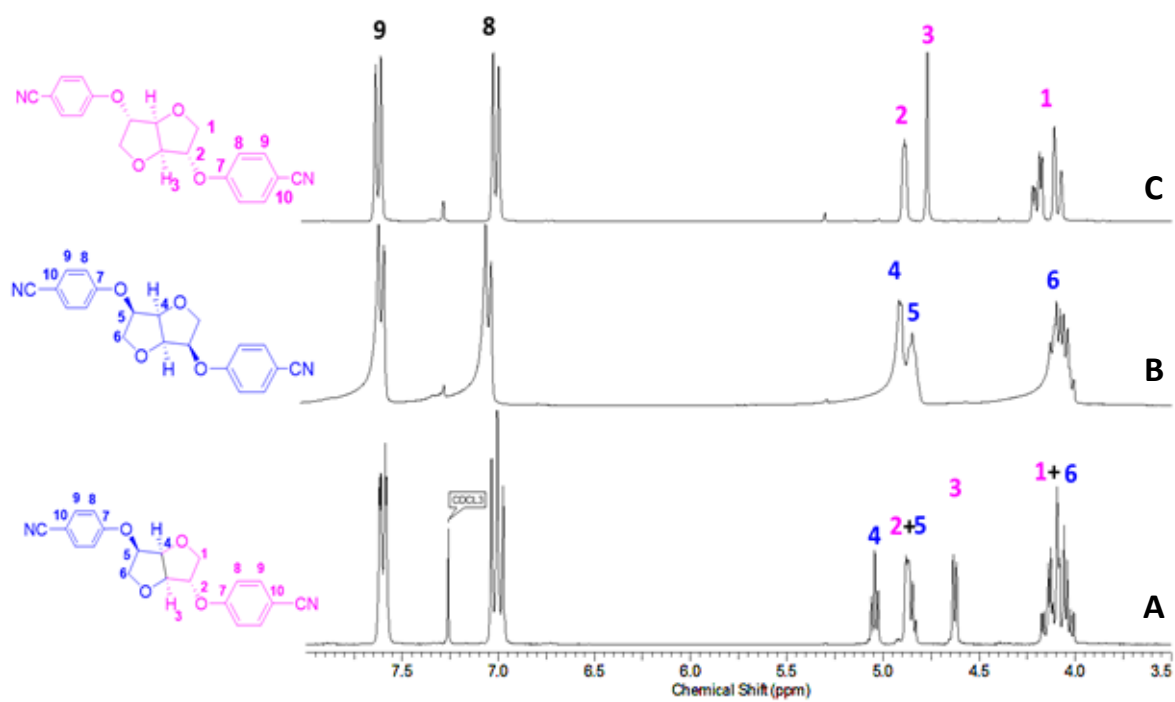

**Figure S2.**  $^1\text{H}$  spectra of **11** (A), **12** (B) and **13** (C).

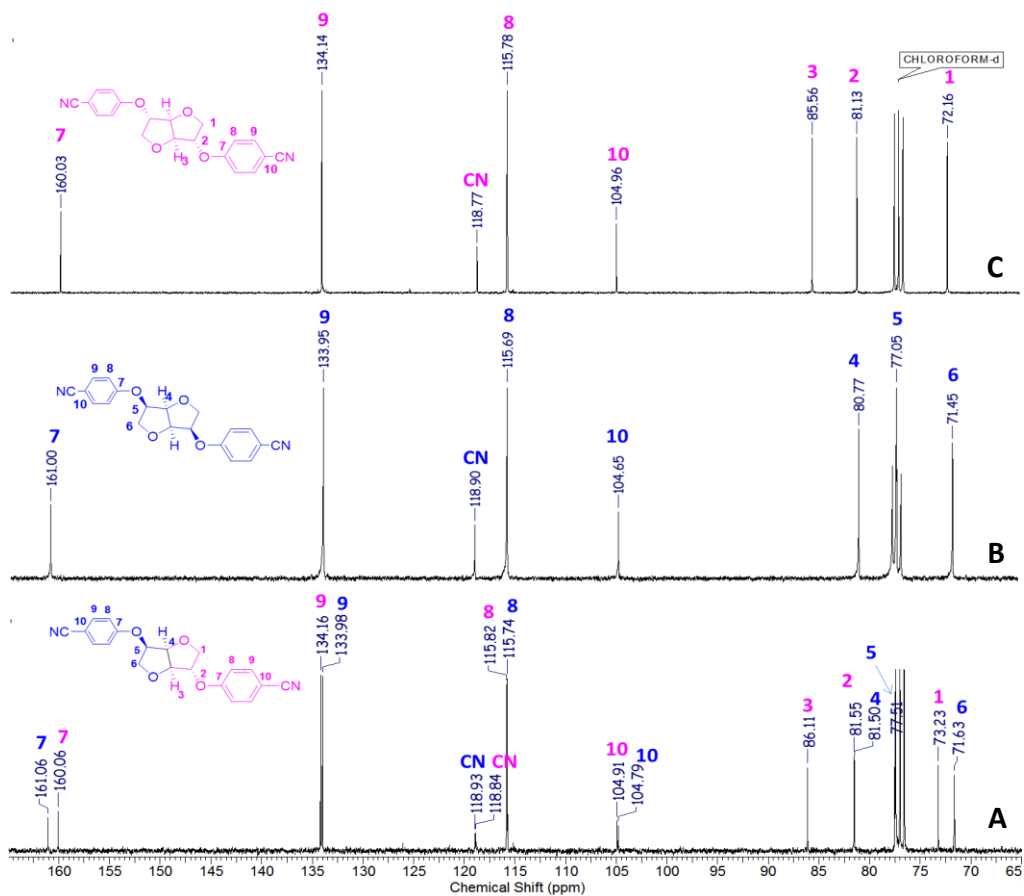

**Figure S3.**  $^{13}\text{C}$  spectra of 11 (A), 12 (B) and 13 (C)

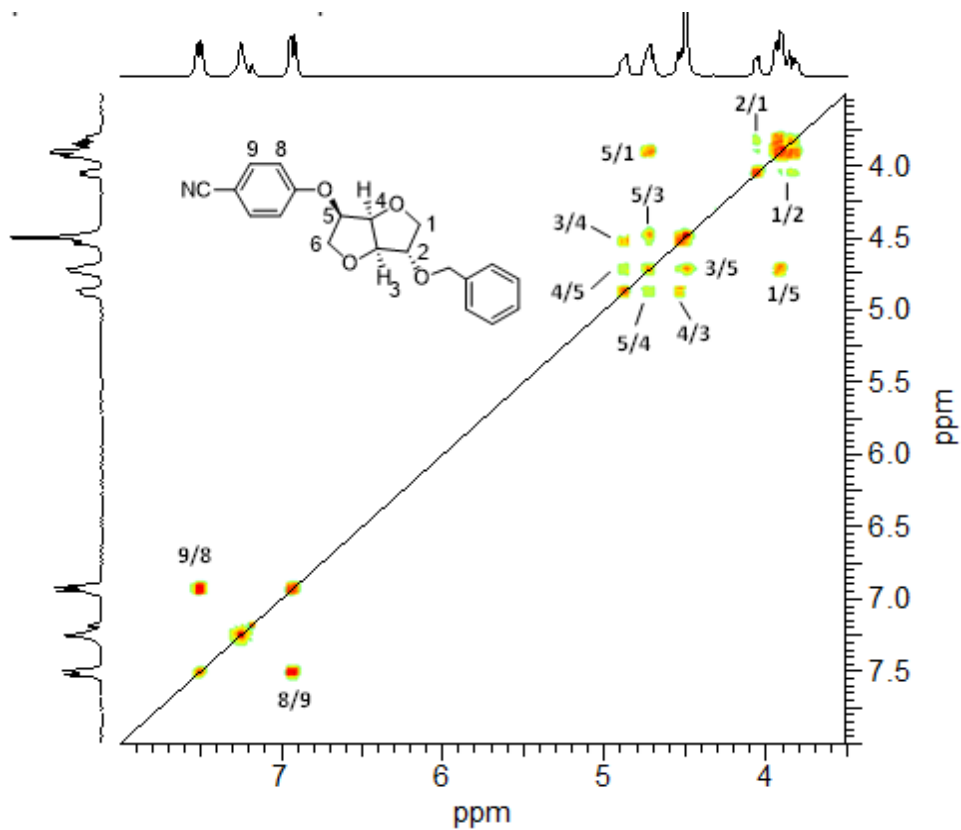

**Figure S4.** 300 MHz correlation spectrum (COSY) of **1b**.

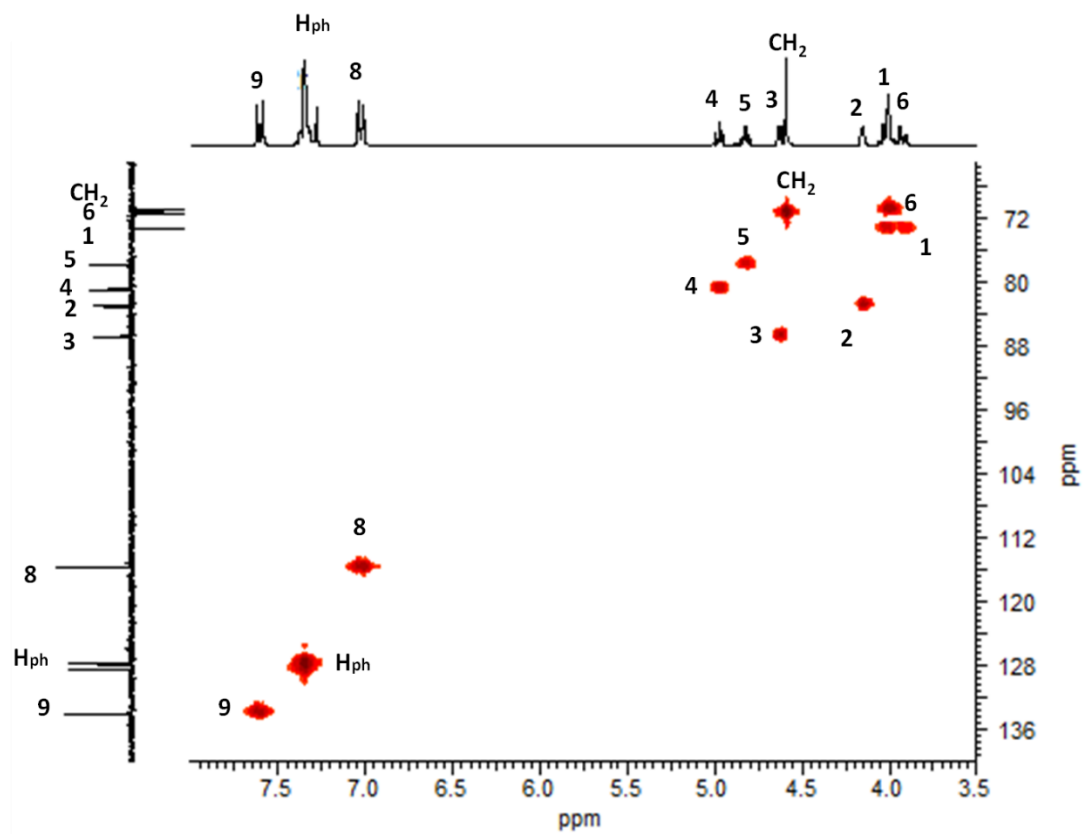

**Figure S5.** 300 MHz correlation spectrum (HSQC) of **1b**

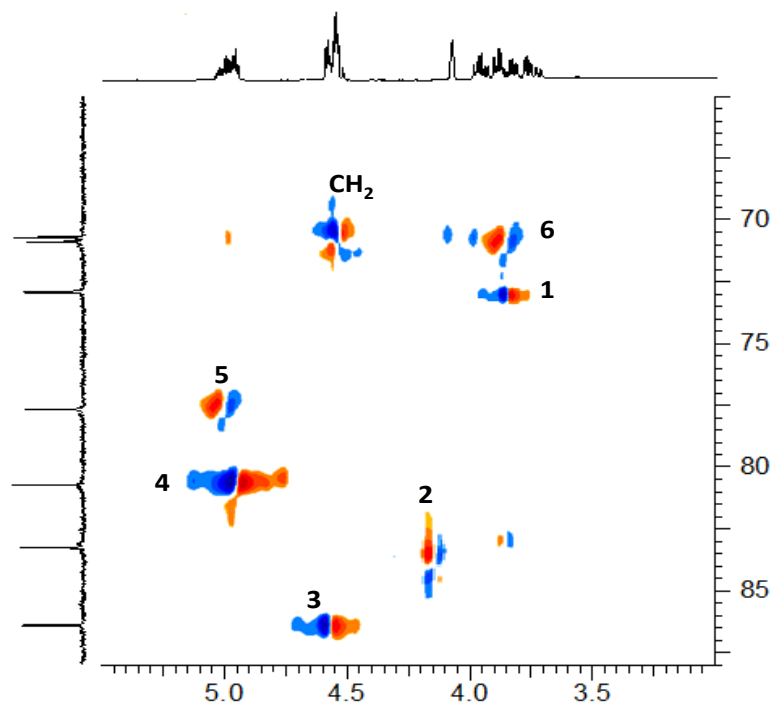

**Figure S6.** Zoom of 500 MHz correlation spectrum (HSQC) of **1h**

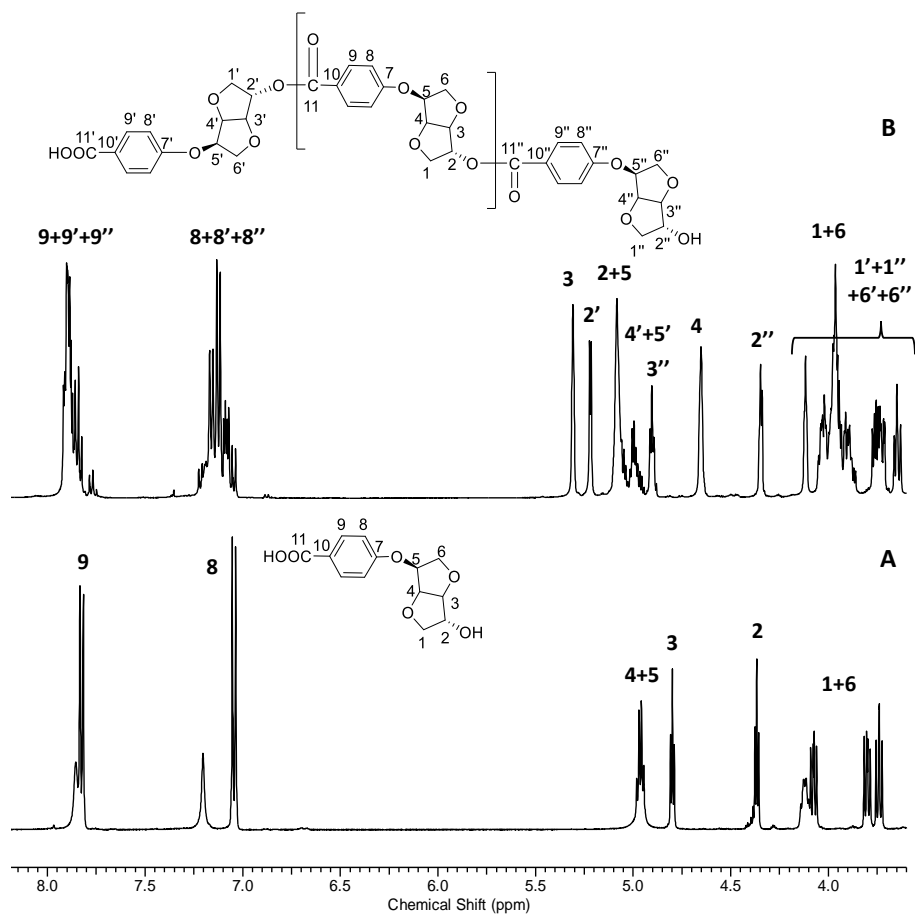

**Figure S7.**  $^1\text{H}$  spectra of **1g** (A) and **Pe(B)** [ $\text{DMSO-}d_6$ , 500 MHz]
